# Supplementary material for: Photochemically-Mediated Inflammation and Cross-Presentation of Mycobacterium bovis BCG Proteins Stimulates Strong CD4 and CD8 T-Cell Responses in Mice
Source: PubMed Central journal article supplement (PMC8841863; doi:10.3389/fimmu.2022.815609), 2022-01-31
Supplement: DataSheet_1.pdf [file DataSheet_1.pdf]

## Supplementary Materials

Waeckerle-Men, et al.

Photochemically-mediated inflammation and cross-presentation of *Mycobacterium bovis* BCG proteins stimulates strong CD4 and CD8 T-cell responses in mice

Submission to *Frontiers in Immunology*

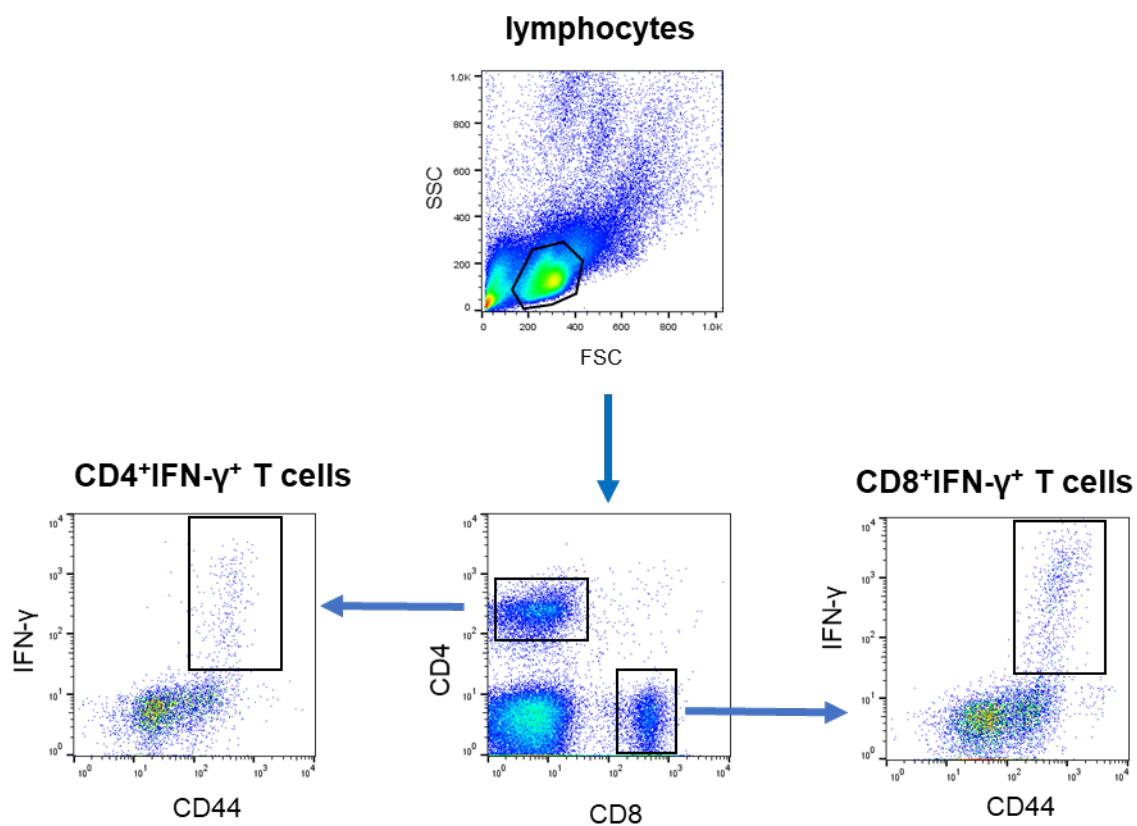

### Supplemental Figure S1.

Representative flow cytometry gating strategy for detection of IFN- $\gamma$  producing CD4 and CD8 T cells in splenocytes of B6 mice after PCI-based BCG vaccination as presented in **Fig. 1C**.

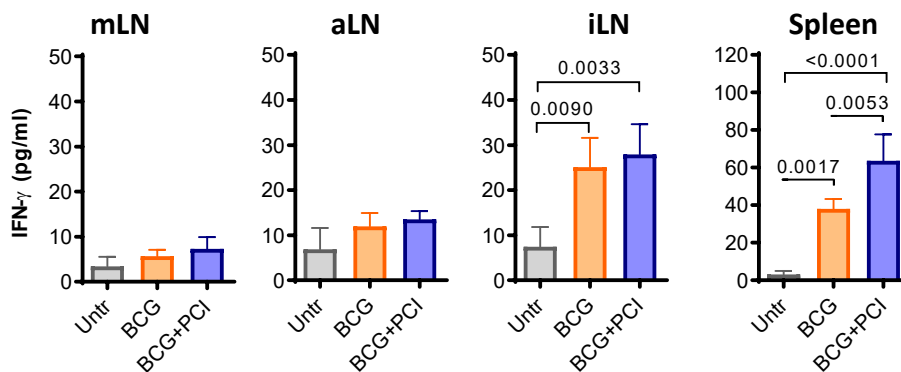

## Supplemental Figure S2.

**PCI treatment increased MHC class I-restricted antigen-presentation in secondary lymphoid organs after BCG vaccination.** Groups of four C57BL/6 mice were *i.d.* vaccinated with BCG::OVA  $\pm$  PCI and light-treated one day later. Untreated animals were used as control (Untr, n=3). Two days after vaccination, mice were euthanized and spleen, inguinal, mesenteric, and axillary LNs were isolated and single-cell suspension thereof were used as APCs ( $1 \times 10^5$ ) to present SIINFEKL OT-I cells ( $2 \times 10^4$ ) in co-cultures. After 72 h, IFN- $\gamma$  concentrations in the supernatants were measured with ELISA. Means and SDs are shown.

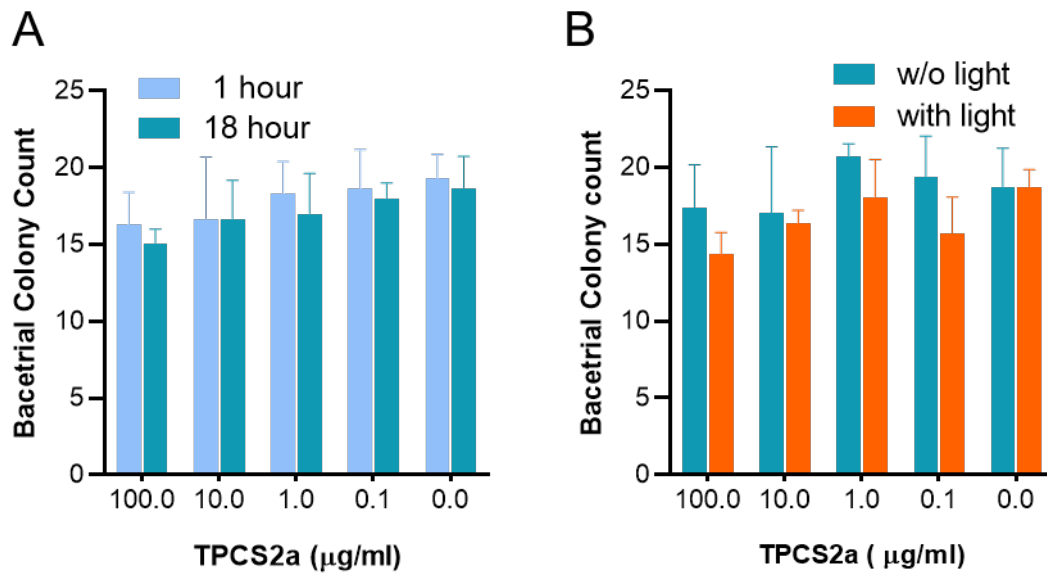

### Supplemental Figure S3.

**Co-incubation of Photosensitizer TPCS2a and BCG does not affect BCG viability.** (A) BCG mycobacteria ( $2 \times 10^2$  /ml) were incubated with a serial concentration of PS TPCS2a for 1 or 18 hours at 37°C in dark. Mixtures of BCG and TPCS2a were then seeded to 7H10 bacterial culture petri dishes as 100 μl/area, protected from the light, and were incubated at 37°C. After 3 weeks, BCG bacterial colonies were counted and compared with those obtained from BCG without PS (TPCS2a 0.0 μg/ml). Heat-killed (100 °C, 2h) BCG samples were used as negative controls for BCG viability (mean bacterial count < 1; data not shown). (B) BCG and TPCS2a were first prepared and incubated for 18 hours as indicated in (A). After washed thrice with PBS, half of the mixtures were illuminated for 3 minutes and the other half was left without light treatment. The BCG was then seeded to 7H10 dishes for 3 weeks for mycobacterial colony enumeration. Results are from triplicate BCG cultures from each experiment. Shown are means and SEM from individual groups. The experiments were repeated 2 times with comparable results.
